# Supplementary material for: Occupational COVID-19 Exposures and Illnesses among Workers in California—Analysis of a New Occupational COVID-19 Surveillance System
Source: MDPI journal article supplement (doi:10.3390/ijerph20136307), 2023-07-06
Supplement: s1 [file s1]

**1. Description of algorithm and keywords used to screen for COVID-19 DFRs**

**1. Screen DFR for COVID-19 diagnosis.**

- a. If missing or other diagnosis is listed (for example asthma, suspected/exposure to covid, contact w and exposure to other communicable diseases), look for positive COVID-19 test result and a mention of COVID-19 anywhere in the DFR.

**2. Screen for COVID-19 associated respiratory signs and symptoms.**

- a. Cough, shortness of breath, wheeze, chest tightness

**3. Screen for other COVID-19 associated symptoms.**

- a. Fever, runny nose, congestion, diarrhea, headache, body ache, loss of sense of smell/taste, chills, fatigue.

**4. Search for mention of work-relatedness.**

- a. "Contracted covid at work" or "exposed to coworker who tested positive" or "worked with clients/patients with covid"

**5. Search for mention of "vaccination" and/or "booster" status**

**6. Screen for history of prior COVID-19 exposure or illness.**

- a. Long haul covid
- b. Past medical history of covid
- c. Mention of first time or second time with covid

**2. State of California Doctor's First Report Form 5021.**

[5021.pdf \(ca.gov\)](#)
