# Supplementary material for: Occupational COVID-19 Exposures and Illnesses among Workers in California—Analysis of a New Occupational COVID-19 Surveillance System
Source: Int J Environ Res Public Health. 2023 Jul 6;20(13):6307. doi: 10.3390/ijerph20136307 (PMC10341532; doi:10.3390/ijerph20136307)
Supplement: Supplementary file 1 [file ijerph-20-06307-s001.zip]

Archive with 4 entries (4 files):
- 6. OHB DFR Manuscript Supplemental Tables.xlsx
- 7. OHB DFR Manuscript Supplemental materials.pdf
- Supplement Figure S1.TIFF
- Supplement Figure S2.tiff
