# Supplementary material for: Occupational COVID-19 Exposures and Illnesses among Workers in California—Analysis of a New Occupational COVID-19 Surveillance System
Source: Int J Environ Res Public Health. 2023 Jul 6;20(13):6307. doi: 10.3390/ijerph20136307 (PMC10341532; doi:10.3390/ijerph20136307)
Supplement: Supplementary file 1 [file ijerph-20-06307-s001.zip › 6. OHB DFR Manuscript Supplemental Tables.xlsx]

## Sheet: Supplemental Table S1
	Occupation Major Group																			RUCA	WGA
Supplemental Table S1	Archictecture and Engineering	Building and Grounds Cleaning and Maintenance	Business and Financial	Community and Social Service	Construction and Extraction	Education, Training, and Library	Farming, Fishing, and Forestry	Food Preparation and Serving Related	Healthcare Practitioners and Technical	Healthcare Support	Installation, Maintenance, and Repair	Management	Office and Administrative Support	Personal Care and Service	Production	Protective Service	Sales and Related	Transportation and Material Moving	Unknown	Unknown RUCA	Unknown Worker Group Assignment
	N (%)	N (%)	N (%)	N (%)	N (%)	N (%)	N (%)	N (%)	N (%)	N (%)	N (%)	N (%)	N (%)	N (%)	N (%)	N (%)	N (%)	N (%)	N (%)	N (%)	N (%)
N	6	55	17	25	23	20	23	31	914	242	30	56	189	10	28	591	9	19	552	111	553
Demographic
Age, median (IQR)	46.5 (42.25, 50)	48 (41, 57)	50 (42, 61)	45 (38, 51)	48 (44.5, 57.5)	49 (41, 52)	43 (35, 54)	47 (37.5, 58)	40 (32, 52)	42 (28.75, 55)	43 (36, 51.75)	49 (41, 59)	40 (29, 48)	51 (26.25, 61)	47 (39.5, 57.5)	41 (32, 48)	57 (50, 63)	47 (42, 59)	39 (30, 50)	42 (31, 50)	39 (30, 50)
Age Group
18-29	--	ⱡ	--	ⱡ	ⱡ	ⱡ	ⱡ	ⱡ	158 (17.29)	66 (27.27)	ⱡ	ⱡ	48 (25.4)	ⱡ	ⱡ	100 (16.92)	ⱡ	--	129 (23.37)	17 (15.32)	129 (23.33)
30-39	ⱡ	7 (12.73)	ⱡ	7 (28)	ⱡ	ⱡ	ⱡ	ⱡ	293 (32.06)	44 (18.18)	7 (23.33)	9 (16.07)	46 (24.34)	ⱡ	5 (17.86)	162 (27.41)	--	ⱡ	140 (25.36)	27 (24.32)	141 (25.5)
40-49	ⱡ	19 (34.55)	5 (29.41)	9 (36)	8 (34.78)	8 (40)	7 (30.43)	9 (29.03)	191 (20.9)	44 (18.18)	10 (33.33)	16 (28.57)	52 (27.51)	ⱡ	9 (32.14)	208 (35.19)	ⱡ	8 (42.11)	123 (22.28)	33 (29.73)	123 (22.24)
50-59	ⱡ	17 (30.91)	ⱡ	5 (20)	7 (30.43)	6 (30)	7 (30.43)	7 (22.58)	160 (17.51)	51 (21.07)	9 (30)	15 (26.79)	28 (14.81)	ⱡ	6 (21.43)	106 (17.94)	ⱡ	ⱡ	103 (18.66)	19 (17.12)	103 (18.63)
60-64	--	6 (10.91)	ⱡ	ⱡ	ⱡ	ⱡ	ⱡ	ⱡ	56 (6.13)	28 (11.57)	ⱡ	12 (21.43)	10 (5.29)	ⱡ	ⱡ	12 (2.03)	ⱡ	5 (26.32)	28 (5.07)	ⱡ	28 (5.06)
65+	--	ⱡ	ⱡ	ⱡ	ⱡ	ⱡ	--	ⱡ	28 (3.06)	7 (2.89)	--	--	5 (2.65)	ⱡ	ⱡ	ⱡ	ⱡ	--	5 (0.91)	ⱡ	5 (0.9)
Missing	--	ⱡ	ⱡ	--	--	--	--	ⱡ	28 (3.06)	ⱡ	--	--	--	ⱡ	ⱡ	ⱡ	--	--	24 (4.35)	7 (6.31)	24 (4.34)
Sex
Male	ⱡ	20 (36.36)	ⱡ	10 (40)	23 (100)	ⱡ	12 (52.17)	11 (35.48)	281 (30.74)	46 (19.01)	29 (96.67)	17 (30.36)	32 (16.93)	ⱡ	23 (82.14)	479 (81.05)	ⱡ	14 (73.68)	261 (47.28)	53 (47.75)	262 (47.38)
Female	ⱡ	35 (63.64)	13 (76.47)	15 (60)	--	17 (85)	11 (47.83)	20 (64.52)	627 (68.6)	193 (79.75)	ⱡ	39 (69.64)	156 (82.54)	7 (70)	5 (17.86)	112 (18.95)	5 (55.56)	5 (26.32)	187 (33.88)	50 (45.05)	187 (33.82)
Unknown	--	--	--	--	--	--	--	--	6 (0.66)	ⱡ	--	--	ⱡ	--	--	--	--	--	104 (18.84)	8 (7.21)	104 (18.81)
Rural-Urban Commuting Area
Metropolitan	6 (100)	52 (94.55)	15 (88.24)	21 (84)	21 (91.3)	14 (70)	17 (73.91)	23 (74.19)	864 (94.53)	226 (93.39)	29 (96.67)	54 (96.43)	175 (92.59)	10 (100)	26 (92.86)	482 (81.56)	8 (88.89)	18 (94.74)	480 (86.96)	--	481 (86.98)
Nonmetropolitan	--	ⱡ	ⱡ	ⱡ	ⱡ	5 (25)	5 (21.74)	6 (19.35)	23 (2.52)	8 (3.31)	ⱡ	ⱡ	10 (5.29)	--	ⱡ	69 (11.68)	ⱡ	ⱡ	49 (8.88)	--	49 (8.86)
Unknown	--	ⱡ	--	ⱡ	--	ⱡ	ⱡ	ⱡ	27 (2.95)	8 (3.31)	--	--	ⱡ	--	--	40 (6.77)	--	--	23 (4.17)	111 (100)	23 (4.16)
Worker Group Assignment																					--
Public Facing Occupation	--	--	ⱡ	25 (100)	--	20 (100)	--	18 (58.06)	--	--	--	5 (8.93)	17 (8.99)	10 (100)	--	588 (99.49)	6 (66.67)	ⱡ	--	45 (40.54)	--
Healthcare Occupation	--	--	--	--	--	--	--	--	914 (100)	242 (100)	--	36 (64.29)	--	--	--	--	--	--	--	35 (31.53)	--
Other Occupations	6 (100)	55 (100)	15 (88.24)	--	23 (100)	--	23 (100)	13 (41.94)	--	--	30 (100)	15 (26.79)	172 (91.01)	--	28 (100)	ⱡ	ⱡ	15 (78.95)	--	8 (7.21)	--
Unknown	--	--	--	--	--	--	--	--	--	--	--	--	--	--	--	--	--	--	552 (100)	23 (20.72)	553 (100)
Exposures
Suspected Source
Patient	--	10 (18.18)	6 (35.29)	ⱡ	--	--	--	--	324 (35.45)	94 (38.84)	2 (6.67)	9 (16.07)	35 (18.52)	ⱡ	ⱡ	26 (4.4)	--	--	26 (4.71)	13 (11.71)	26 (4.7)
Client/Customer	--	5 (9.09)	--	ⱡ	ⱡ	6 (30)	--	ⱡ	48 (5.25)	13 (5.37)	--	ⱡ	7 (3.7)	ⱡ	ⱡ	140 (23.69)	--	--	11 (1.99)	22 (19.82)	11 (1.99)
Co-worker	ⱡ	10 (18.18)	ⱡ	ⱡ	9 (39.13)	ⱡ	ⱡ	7 (22.58)	52 (5.69)	11 (4.55)	12 (40)	10 (17.86)	24 (12.7)	--	13 (46.43)	108 (18.27)	ⱡ	6 (31.58)	44 (7.97)	10 (9.01)	44 (7.96)
Personal	--	--	--	--	ⱡ	--	ⱡ	--	19 (2.08)	5 (2.07)	ⱡ	ⱡ	7 (3.7)	--	--	6 (1.02)	ⱡ	ⱡ	7 (1.27)	ⱡ	7 (1.27)
Not Stated	ⱡ	32 (58.18)	7 (41.18)	17 (68)	12 (52.17)	11 (55)	20 (86.96)	22 (70.97)	483 (52.84)	120 (49.59)	13 (43.33)	34 (60.71)	121 (64.02)	5 (50)	12 (42.86)	340 (57.53)	7 (77.78)	13 (68.42)	465 (84.24)	67 (60.36)	466 (84.27)
Unknown to Patient	ⱡ	ⱡ	ⱡ	--	--	ⱡ	ⱡ	--	12 (1.31)	6 (2.48)	ⱡ	ⱡ	ⱡ	--	--	9 (1.52)	--	--	6 (1.09)	ⱡ	6 (1.08)
Exposure Site/Worksite
Institution	ⱡ	41 (74.55)	13 (76.47)	23 (92)	11 (47.83)	20 (100)	--	24 (77.42)	900 (98.47)	241 (99.59)	10 (33.33)	44 (78.57)	147 (77.78)	7 (70)	8 (28.57)	376 (63.62)	--	ⱡ	374 (67.75)	88 (79.28)	374 (67.63)
Commercial facility, non-manufacturing	--	6 (10.91)	ⱡ	--	--	--	--	5 (16.13)	--	--	ⱡ	ⱡ	28 (14.81)	--	ⱡ	ⱡ	7 (77.78)	8 (42.11)	25 (4.53)	ⱡ	25 (4.52)
Other	ⱡ	ⱡ	--	--	ⱡ	--	ⱡ	ⱡ	ⱡ	--	--	ⱡ	5 (2.65)	--	ⱡ	25 (4.23)	--	ⱡ	10 (1.81)	ⱡ	10 (1.81)
Agricultural	--	--	--	--	--	--	11 (47.83)	--	--	--	--	--	ⱡ	--	ⱡ	ⱡ	--	--	7 (1.27)	ⱡ	7 (1.27)
Manufacturing	--	--	--	--	--	--	ⱡ	--	--	--	--	ⱡ	--	--	ⱡ	--	--	--	6 (1.09)	--	6 (1.08)
More than one site	--	--	--	--	--	--	--	--	ⱡ	ⱡ	--	--	--	--	--	ⱡ	--	--	--	--	--
Private Residence	--	--	--	--	--	--	--	--	--	--	--	--	--	ⱡ	--	--	--	--	--	--	--
Unknown	ⱡ	5 (9.09)	ⱡ	ⱡ	11 (47.83)	--	8 (34.78)	ⱡ	10 (1.09)	--	19 (63.33)	5 (8.93)	7 (3.7)	ⱡ	12 (42.86)	183 (30.96)	ⱡ	5 (26.32)	130 (23.55)	18 (16.22)	131 (23.69)
Personal Protective Equipment
Any worn	--	--	--	--	--	ⱡ	--	ⱡ	17 (1.86)	ⱡ	ⱡ	ⱡ	ⱡ	--	--	11 (1.86)	ⱡ	--	ⱡ	ⱡ	ⱡ
None worn	--	--	--	--	--	--	--	--	5 (0.55)	--	--	--	ⱡ	--	--	ⱡ	ⱡ	--	--	--	--
Unknown	6 (100)	55 (100)	17 (100)	25 (100)	23 (100)	19 (95)	23 (100)	30 (96.77)	892 (97.59)	238 (98.35)	29 (96.67)	55 (98.21)	186 (98.41)	10 (100)	28 (100)	579 (97.97)	7 (77.78)	19 (100)	548 (99.28)	109 (98.2)	549 (99.28)
Type of Care for DFR
Doctors Office	ⱡ	20 (36.36)	ⱡ	11 (44)	10 (43.48)	8 (40)	11 (47.83)	9 (29.03)	232 (25.38)	87 (35.95)	8 (26.67)	14 (25)	53 (28.04)	ⱡ	8 (28.57)	296 (50.08)	ⱡ	10 (52.63)	241 (43.66)	60 (54.05)	242 (43.76)
Emergency Department	ⱡ	21 (38.18)	5 (29.41)	ⱡ	--	--	7 (30.43)	ⱡ	235 (25.71)	41 (16.94)	ⱡ	11 (19.64)	51 (26.98)	ⱡ	ⱡ	20 (3.38)	--	--	120 (21.74)	5 (4.5)	120 (21.7)
Hospital Admission	--	--	--	--	--	--	--	--	ⱡ	--	--	--	--	--	--	ⱡ	--	--	ⱡ	--	ⱡ
No Medical Care Sought (typically due to employer first report)	--	ⱡ	--	--	--	ⱡ	--	ⱡ	--	--	--	ⱡ	ⱡ	--	--	--	--	ⱡ	--	--	--
Employee Health Center	--	ⱡ	5 (29.41)	ⱡ	--	--	--	ⱡ	102 (11.16)	25 (10.33)	--	6 (10.71)	14 (7.41)	--	ⱡ	ⱡ	--	--	27 (4.89)	ⱡ	27 (4.88)
Telemedicine	ⱡ	9 (16.36)	ⱡ	8 (32)	13 (56.52)	5 (25)	ⱡ	14 (45.16)	324 (35.45)	86 (35.54)	18 (60)	23 (41.07)	67 (35.45)	ⱡ	11 (39.29)	263 (44.5)	6 (66.67)	5 (26.32)	134 (24.28)	40 (36.04)	134 (24.23)
Unknown	--	ⱡ	ⱡ	--	--	6 (30)	ⱡ	--	18 (1.97)	ⱡ	ⱡ	ⱡ	ⱡ	ⱡ	ⱡ	6 (1.02)	--	ⱡ	29 (5.25)	ⱡ	29 (5.24)
Outcomes
Any Symptoms
Yes	5 (83.33)	41 (74.55)	13 (76.47)	19 (76)	20 (86.96)	7 (35)	7 (30.43)	21 (67.74)	630 (68.93)	153 (63.22)	25 (83.33)	35 (62.5)	121 (64.02)	7 (70)	19 (67.86)	445 (75.3)	8 (88.89)	16 (84.21)	332 (60.14)	87 (78.38)	333 (60.22)
Hospitalized
Yes	--	ⱡ	ⱡ	ⱡ	--	--	ⱡ	ⱡ	28 (3.06)	5 (2.07)	--	--	6 (3.17)	ⱡ	ⱡ	38 (6.43)	ⱡ	ⱡ	13 (2.36)	11 (9.91)	13 (2.35)
No	6 (100)	53 (96.36)	16 (94.12)	23 (92)	23 (100)	20 (100)	22 (95.65)	27 (87.1)	886 (96.94)	237 (97.93)	30 (100)	56 (100)	183 (96.83)	9 (90)	26 (92.86)	553 (93.57)	6 (66.67)	15 (78.95)	539 (97.64)	100 (90.09)	540 (97.65)
Died (link by SSN alone)
Yes	--	--	--	1	--	--	--	--	2	--	--	--	--	--	--	1	--	--	--
No									--
Lost Work
Yes	5 (83.33)	25 (45.45)	8 (47.06)	13 (52)	20 (86.96)	16 (80)	18 (78.26)	21 (67.74)	418 (45.73)	110 (45.45)	24 (80)	27 (48.21)	80 (42.33)	7 (70)	21 (75)	480 (81.22)	8 (88.89)	17 (89.47)	201 (36.41)	81 (72.97)	202 (36.53)
No	--	8 (14.55)	5 (29.41)	ⱡ	ⱡ	ⱡ	ⱡ	ⱡ	156 (17.07)	59 (24.38)	--	12 (21.43)	41 (21.69)	--	ⱡ	34 (5.75)	--	--	12 (2.17)	9 (8.11)	12 (2.17)
Unknown	ⱡ	22 (40)	ⱡ	11 (44)	ⱡ	ⱡ	4 (17.39)	6 (19.35)	340 (37.2)	73 (30.17)	6 (20)	17 (30.36)	68 (35.98)	ⱡ	5 (17.86)	77 (13.03)	ⱡ	ⱡ	339 (61.41)	21 (18.92)	339 (61.3)
Lost Work Reason
Due to Illness/Symptoms	5 (83.33)	22 (40)	7 (41.18)	12 (48)	20 (86.96)	14 (70)	16 (69.57)	18 (58.06)	370 (40.48)	92 (38.02)	23 (76.67)	21 (37.5)	75 (39.68)	7 (70)	19 (67.86)	422 (71.4)	8 (88.89)	15 (78.95)	195 (35.33)	75 (67.57)	196 (35.44)
Quarantine or Asymptomatic*	--	ⱡ	1 (5.88)	ⱡ	--	ⱡ	ⱡ	ⱡ	48 (5.25)	18 (7.44)	1 (3.33)	6 (10.71)	5 (2.65)	--	ⱡ	58 (9.81)	--	ⱡ	6 (1.09)	9 (8.11)	12 (2.17)
No Lost Time	--	8 (14.55)	5 (29.41)	ⱡ	ⱡ	ⱡ	ⱡ	ⱡ	156 (17.07)	59 (24.38)	--	12 (21.43)	41 (21.69)	--	ⱡ	34 (5.75)	--	--	12 (2.17)	6 (5.41)	6 (1.08)
Unknown	ⱡ	22 (40)	ⱡ	11 (44)	ⱡ	ⱡ	ⱡ	6 (19.35)	340 (37.2)	73 (30.17)	6 (20)	17 (30.36)	68 (35.98)	ⱡ	5 (17.86)	77 (13.03)	ⱡ	ⱡ	339 (61.41)	21 (18.92)	339 (61.3)
Lost Time Amount
<10 days	ⱡ	8 (14.55)	ⱡ	ⱡ	9 (39.13)	6 (30)	ⱡ	ⱡ	108 (11.82)	28 (11.57)	ⱡ	10 (17.86)	18 (9.52)	--	5 (17.86)	195 (32.99)	ⱡ	5 (26.32)	58 (10.51)	25 (22.52)	58 (10.49)
≥10 days	ⱡ	7 (12.73)	ⱡ	5 (20)	5 (21.74)	ⱡ	--	13 (41.94)	167 (18.27)	44 (18.18)	13 (43.33)	8 (14.29)	42 (22.22)	ⱡ	7 (25)	186 (31.47)	ⱡ	9 (47.37)	71 (12.86)	38 (34.23)	71 (12.84)
Lost Work but Unknown Amount	ⱡ	10 (18.18)	ⱡ	7 (28)	6 (26.09)	7 (35)	15 (65.22)	ⱡ	143 (15.65)	38 (15.7)	7 (23.33)	9 (16.07)	20 (10.58)	ⱡ	9 (32.14)	99 (16.75)	ⱡ	ⱡ	72 (13.04)	18 (16.22)	73 (13.2)
Unknown	ⱡ	22 (40)	ⱡ	11 (44)	ⱡ	ⱡ	ⱡ	6 (19.35)	340 (37.2)	73 (30.17)	6 (20)	17 (30.36)	68 (35.98)	ⱡ	5 (17.86)	77 (13.03)	ⱡ	ⱡ	339 (61.41)	21 (18.92)	339 (61.3)
Industry Group
Accomodation and Food Services	--	ⱡ	--	--	--	--	--	6 (19.35)	--	--	--	ⱡ	ⱡ	--	--	ⱡ	--	--	5 (0.91)	--	5 (0.9)
Administrative and Support and Waste Management Services	ⱡ	7 (12.73)	--	--	ⱡ	--	--	--	ⱡ	--	ⱡ	--	--	--	ⱡ	ⱡ	--	ⱡ	15 (2.72)	--	15 (2.71)
Agriculture, Forestry, Fishing, and Hunting	--	--	--	--	ⱡ	--	23 (100)	--	--	--	ⱡ	ⱡ	ⱡ	--	--	30 (5.08)	--	--	25 (4.53)	ⱡ	25 (4.52)
Arts, Entertainment, and Recreation	--	--	--	--	--	--	--	--	--	--	--	--	ⱡ	--	--	ⱡ	ⱡ	--	--	--	--
Construction	--	--	--	--	ⱡ	--	--	--	--	--	--	--	ⱡ	--	--	--	--	ⱡ	5 (0.91)	ⱡ	5 (0.9)
Educational Services	--	ⱡ	ⱡ	ⱡ	--	13 (65)	--	5 (16.13)	--	--	--	ⱡ	6 (3.17)	ⱡ	--	ⱡ	--	ⱡ	ⱡ	ⱡ	ⱡ
Finance and Insurance	--	--	--	--	--	--	--	--	--	--	--	--	ⱡ	--	--	--	ⱡ	--	--	--	--
Healthcare and Social Assistance	ⱡ	35 (63.64)	11 (64.71)	16 (64)	ⱡ	ⱡ	--	12 (38.71)	868 (94.97)	237 (97.93)	4 (13.33)	39 (69.64)	143 (75.66)	8 (80)	5 (17.86)	11 (1.86)	--	--	294 (53.26)	44 (39.64)	294 (53.16)
Information	--	--	--	--	--	--	--	--	--	--	--	--	--	--	--	--	--	--	ⱡ	--	ⱡ
Management of Companies and Enterprises	--	--	--	--	--	--	--	--	--	--	--	--	--	--	--	--	--	--	ⱡ	--	ⱡ
Manufacturing	ⱡ	--	--	--	--	--	--	--	--	--	--	--	--	--	ⱡ	--	--	--	11 (1.99)	--	11 (1.99)
Other Services, Except Public Administration	--	ⱡ	--	--	--	--	--	--	--	--	ⱡ	ⱡ	--	--	--	--	ⱡ	--	ⱡ	--	ⱡ
Professional, Scientific, and Technical Services	--	--	--	--	--	--	--	--	--	--	--	--	--	--	--	--	--	--	ⱡ	--	ⱡ
Public Administration	ⱡ	ⱡ	ⱡ	6 (24)	13 (56.52)	ⱡ	--	7 (22.58)	40 (4.38)	5 (2.07)	7 (23.33)	7 (12.5)	21 (11.11)	--	7 (25)	534 (90.36)	--	ⱡ	114 (20.65)	46 (41.44)	115 (20.8)
Real Estate and Rental and Leasing	--	--	--	--	--	--	--	--	--	--	--	ⱡ	ⱡ	--	--	--	--	--	13 (2.36)	--	13 (2.35)
Retail Trade	--	--	--	--	--	--	--	--	--	--	ⱡ	--	7 (3.7)	--	ⱡ	--	5 (55.56)	--	6 (1.09)	ⱡ	6 (1.08)
Transportation and Warehousing	--	ⱡ	--	--	--	--	--	--	--	--	--	--	ⱡ	ⱡ	ⱡ	--	ⱡ	7 (36.84)	7 (1.27)	--	7 (1.27)
Utilities	ⱡ	--	ⱡ	--	5 (21.74)	--	--	--	ⱡ	--	14 (46.67)	ⱡ	ⱡ	--	9 (32.14)	--	--	ⱡ	10 (1.81)	ⱡ	10 (1.81)
Wholesale Trade	--	--	--	--	--	--	--	--	--	--	--	--	--	--	--	--	--	ⱡ	ⱡ	--	ⱡ
Unknown	--	--	--	ⱡ	--	--	--	ⱡ	ⱡ	--	ⱡ	--	--	--	--	6 (1.02)	--	ⱡ	31 (5.62)	11 (9.91)	31 (5.61)
*asymptomatic with positive COVID-19 test; ⱡ :suppressed cells less than five

## Sheet: Appendix Table A1 OK
	Occupation Major Group																			RUCA	WGA
Supplemental Table S1	Archictecture and Engineering	Building and Grounds Cleaning and Maintenance	Business and Financial	Community and Social Service	Construction and Extraction	Education, Training, and Library	Farming, Fishing, and Forestry	Food Preparation and Serving Related	Healthcare Practitioners and Technical	Healthcare Support	Installation, Maintenance, and Repair	Management	Office and Administrative Support	Personal Care and Service	Production	Protective Service	Sales and Related	Transportation and Material Moving	Unknown	Unknown RUCA	Unknown Worker Group Assignment
N	6	55	17	25	23	20	23	31	914	242	30	56	189	10	28	591	9	19	552	111	553
Demographic
Age, median (IQR)	46.5 (42.25, 50)	48 (41, 57)	50 (42, 61)	45 (38, 51)	48 (44.5, 57.5)	49 (41, 52)	43 (35, 54)	47 (37.5, 58)	40 (32, 52)	42 (28.75, 55)	43 (36, 51.75)	49 (41, 59)	40 (29, 48)	51 (26.25, 61)	47 (39.5, 57.5)	41 (32, 48)	57 (50, 63)	47 (42, 59)	39 (30, 50)	42 (31, 50)	39 (30, 50)
Age Group
18-29	--	3 (5.45)	--	1 (4)	2 (8.7)	1 (5)	4 (17.39)	5 (16.13)	158 (17.29)	66 (27.27)	2 (6.67)	4 (7.14)	48 (25.4)	3 (30)	2 (7.14)	100 (16.92)	1 (11.11)	--	129 (23.37)	17 (15.32)	129 (23.33)
30-39	1 (16.67)	7 (12.73)	3 (17.65)	7 (28)	2 (8.7)	3 (15)	4 (17.39)	4 (12.9)	293 (32.06)	44 (18.18)	7 (23.33)	9 (16.07)	46 (24.34)	1 (10)	5 (17.86)	162 (27.41)	--	2 (10.53)	140 (25.36)	27 (24.32)	141 (25.5)
40-49	3 (50)	19 (34.55)	5 (29.41)	9 (36)	8 (34.78)	8 (40)	7 (30.43)	9 (29.03)	191 (20.9)	44 (18.18)	10 (33.33)	16 (28.57)	52 (27.51)	1 (10)	9 (32.14)	208 (35.19)	1 (11.11)	8 (42.11)	123 (22.28)	33 (29.73)	123 (22.24)
50-59	2 (33.33)	17 (30.91)	4 (23.53)	5 (20)	7 (30.43)	6 (30)	7 (30.43)	7 (22.58)	160 (17.51)	51 (21.07)	9 (30)	15 (26.79)	28 (14.81)	2 (20)	6 (21.43)	106 (17.94)	3 (33.33)	4 (21.05)	103 (18.66)	19 (17.12)	103 (18.63)
60-64	--	6 (10.91)	1 (5.88)	1 (4)	2 (8.7)	1 (5)	1 (4.35)	3 (9.68)	56 (6.13)	28 (11.57)	2 (6.67)	12 (21.43)	10 (5.29)	1 (10)	4 (14.29)	12 (2.03)	3 (33.33)	5 (26.32)	28 (5.07)	4 (3.6)	28 (5.06)
65+	--	2 (3.64)	3 (17.65)	2 (8)	2 (8.7)	1 (5)	--	1 (3.23)	28 (3.06)	7 (2.89)	--	--	5 (2.65)	1 (10)	1 (3.57)	2 (0.34)	1 (11.11)	--	5 (0.91)	4 (3.6)	5 (0.9)
Missing	--	1 (1.82)	1 (5.88)	--	--	--	--	2 (6.45)	28 (3.06)	2 (0.83)	--	--	--	1 (10)	1 (3.57)	1 (0.17)	--	--	24 (4.35)	7 (6.31)	24 (4.34)
Sex
Male	4 (66.67)	20 (36.36)	4 (23.53)	10 (40)	23 (100)	3 (15)	12 (52.17)	11 (35.48)	281 (30.74)	46 (19.01)	29 (96.67)	17 (30.36)	32 (16.93)	3 (30)	23 (82.14)	479 (81.05)	4 (44.44)	14 (73.68)	261 (47.28)	53 (47.75)	262 (47.38)
Female	2 (33.33)	35 (63.64)	13 (76.47)	15 (60)	--	17 (85)	11 (47.83)	20 (64.52)	627 (68.6)	193 (79.75)	1 (3.33)	39 (69.64)	156 (82.54)	7 (70)	5 (17.86)	112 (18.95)	5 (55.56)	5 (26.32)	187 (33.88)	50 (45.05)	187 (33.82)
Unknown	--	--	--	--	--	--	--	--	6 (0.66)	3 (1.24)	--	--	1 (0.53)	--	--	--	--	--	104 (18.84)	8 (7.21)	104 (18.81)
Rural-Urban Commuting Area
Metropolitan	6 (100)	52 (94.55)	15 (88.24)	21 (84)	21 (91.3)	14 (70)	17 (73.91)	23 (74.19)	864 (94.53)	226 (93.39)	29 (96.67)	54 (96.43)	175 (92.59)	10 (100)	26 (92.86)	482 (81.56)	8 (88.89)	18 (94.74)	480 (86.96)	--	481 (86.98)
Nonmetropolitan	--	1 (1.82)	2 (11.76)	2 (8)	2 (8.7)	5 (25)	5 (21.74)	6 (19.35)	23 (2.52)	8 (3.31)	1 (3.33)	2 (3.57)	10 (5.29)	--	2 (7.14)	69 (11.68)	1 (11.11)	1 (5.26)	49 (8.88)	--	49 (8.86)
Unknown	--	2 (3.64)	--	2 (8)	--	1 (5)	1 (4.35)	2 (6.45)	27 (2.95)	8 (3.31)	--	--	4 (2.12)	--	--	40 (6.77)	--	--	23 (4.17)	111 (100)	23 (4.16)
Worker Group Assignment																					--
Public Facing Occupation	--	--	2 (11.76)	25 (100)	--	20 (100)	--	18 (58.06)	--	--	--	5 (8.93)	17 (8.99)	10 (100)	--	588 (99.49)	6 (66.67)	4 (21.05)	--	45 (40.54)	--
Healthcare Occupation	--	--	--	--	--	--	--	--	914 (100)	242 (100)	--	36 (64.29)	--	--	--	--	--	--	--	35 (31.53)	--
Other Occupations	6 (100)	55 (100)	15 (88.24)	--	23 (100)	--	23 (100)	13 (41.94)	--	--	30 (100)	15 (26.79)	172 (91.01)	--	28 (100)	3 (0.51)	3 (33.33)	15 (78.95)	--	8 (7.21)	--
Unknown	--	--	--	--	--	--	--	--	--	--	--	--	--	--	--	--	--	--	552 (100)	23 (20.72)	553 (100)
	Archictecture and Engineering	Building and Grounds Cleaning and Maintenance	Business and Financial	Community and Social Service	Construction and Extraction	Education, Training, and Library	Farming, Fishing, and Forestry	Food Preparation and Serving Related	Healthcare Practitioners and Technical	Healthcare Support	Installation, Maintenance, and Repair	Management	Office and Administrative Support	Personal Care and Service	Production	Protective Service	Sales and Related	Transportation and Material Moving	Unknown	Unknown RUCA	Unknown Worker Group Assignment
Exposures
Suspected Source
Patient	--	10 (18.18)	6 (35.29)	3 (12)	--	--	--	--	324 (35.45)	94 (38.84)	2 (6.67)	9 (16.07)	35 (18.52)	4 (40)	1 (3.57)	26 (4.4)	--	--	26 (4.71)	13 (11.71)	26 (4.7)
Client/Customer	--	5 (9.09)	--	1 (4)	1 (4.35)	6 (30)	--	2 (6.45)	48 (5.25)	13 (5.37)	--	2 (3.57)	7 (3.7)	1 (10)	2 (7.14)	140 (23.69)	--	--	11 (1.99)	22 (19.82)	11 (1.99)
Co-worker	2 (33.33)	10 (18.18)	3 (17.65)	4 (16)	9 (39.13)	4 (20)	1 (4.35)	7 (22.58)	52 (5.69)	11 (4.55)	12 (40)	10 (17.86)	24 (12.7)	--	13 (46.43)	108 (18.27)	1 (11.11)	6 (31.58)	44 (7.97)	10 (9.01)	44 (7.96)
Personal	--	--	--	--	1 (4.35)	--	1 (4.35)	--	19 (2.08)	5 (2.07)	1 (3.33)	1 (1.79)	7 (3.7)	--	--	6 (1.02)	1 (11.11)	1 (5.26)	7 (1.27)	1 (0.9)	7 (1.27)
Not Stated	2 (33.33)	32 (58.18)	7 (41.18)	17 (68)	12 (52.17)	11 (55)	20 (86.96)	22 (70.97)	483 (52.84)	120 (49.59)	13 (43.33)	34 (60.71)	121 (64.02)	5 (50)	12 (42.86)	340 (57.53)	7 (77.78)	13 (68.42)	465 (84.24)	67 (60.36)	466 (84.27)
Unknown to Patient	2 (33.33)	1 (1.82)	1 (5.88)	--	--	1 (5)	1 (4.35)	--	12 (1.31)	6 (2.48)	2 (6.67)	2 (3.57)	2 (1.06)	--	--	9 (1.52)	--	--	6 (1.09)	1 (0.9)	6 (1.08)
Exposure Site/Worksite
Institution	1 (16.67)	41 (74.55)	13 (76.47)	23 (92)	11 (47.83)	20 (100)	--	24 (77.42)	900 (98.47)	241 (99.59)	10 (33.33)	44 (78.57)	147 (77.78)	7 (70)	8 (28.57)	376 (63.62)	--	4 (21.05)	374 (67.75)	88 (79.28)	374 (67.63)
Commercial facility, non-manufacturing	--	6 (10.91)	1 (5.88)	--	--	--	--	5 (16.13)	--	--	1 (3.33)	4 (7.14)	28 (14.81)	--	2 (7.14)	3 (0.51)	7 (77.78)	8 (42.11)	25 (4.53)	2 (1.8)	25 (4.52)
Other	2 (33.33)	3 (5.45)	--	--	1 (4.35)	--	1 (4.35)	1 (3.23)	2 (0.22)	--	--	2 (3.57)	5 (2.65)	--	2 (7.14)	25 (4.23)	--	2 (10.53)	10 (1.81)	2 (1.8)	10 (1.81)
Agricultural	--	--	--	--	--	--	11 (47.83)	--	--	--	--	--	2 (1.06)	--	1 (3.57)	2 (0.34)	--	--	7 (1.27)	1 (0.9)	7 (1.27)
Manufacturing	--	--	--	--	--	--	3 (13.04)	--	--	--	--	1 (1.79)	--	--	3 (10.71)	--	--	--	6 (1.09)	--	6 (1.08)
More than one site	--	--	--	--	--	--	--	--	2 (0.22)	1 (0.41)	--	--	--	--	--	2 (0.34)	--	--	--	--	--
Private Residence	--	--	--	--	--	--	--	--	--	--	--	--	--	1 (10)	--	--	--	--	--	--	--
Unknown	3 (50)	5 (9.09)	3 (17.65)	2 (8)	11 (47.83)	--	8 (34.78)	1 (3.23)	10 (1.09)	--	19 (63.33)	5 (8.93)	7 (3.7)	2 (20)	12 (42.86)	183 (30.96)	2 (22.22)	5 (26.32)	130 (23.55)	18 (16.22)	131 (23.69)
Personal Protective Equipment
Any worn	--	--	--	--	--	1 (5)	--	1 (3.23)	17 (1.86)	4 (1.65)	1 (3.33)	1 (1.79)	2 (1.06)	--	--	11 (1.86)	1 (11.11)	--	4 (0.72)	2 (1.8)	4 (0.72)
None worn	--	--	--	--	--	--	--	--	5 (0.55)	--	--	--	1 (0.53)	--	--	1 (0.17)	1 (11.11)	--	--	--	--
Unknown	6 (100)	55 (100)	17 (100)	25 (100)	23 (100)	19 (95)	23 (100)	30 (96.77)	892 (97.59)	238 (98.35)	29 (96.67)	55 (98.21)	186 (98.41)	10 (100)	28 (100)	579 (97.97)	7 (77.78)	19 (100)	548 (99.28)	109 (98.2)	549 (99.28)
Type of Care for DFR
Doctors Office	4 (66.67)	20 (36.36)	4 (23.53)	11 (44)	10 (43.48)	8 (40)	11 (47.83)	9 (29.03)	232 (25.38)	87 (35.95)	8 (26.67)	14 (25)	53 (28.04)	2 (20)	8 (28.57)	296 (50.08)	3 (33.33)	10 (52.63)	241 (43.66)	60 (54.05)	242 (43.76)
Emergency Department	1 (16.67)	21 (38.18)	5 (29.41)	4 (16)	--	--	7 (30.43)	4 (12.9)	235 (25.71)	41 (16.94)	2 (6.67)	11 (19.64)	51 (26.98)	4 (40)	3 (10.71)	20 (3.38)	--	--	120 (21.74)	5 (4.5)	120 (21.7)
Hospital Admission	--	--	--	--	--	--	--	--	3 (0.33)	--	--	--	--	--	--	4 (0.68)	--	--	1 (0.18)	--	1 (0.18)
No Medical Care Sought (typically due to employer first report)	--	1 (1.82)	--	--	--	1 (5)	--	3 (9.68)	--	--	--	1 (1.79)	1 (0.53)	--	--	--	--	1 (5.26)	--	--	--
Employee Health Center	--	2 (3.64)	5 (29.41)	2 (8)	--	--	--	1 (3.23)	102 (11.16)	25 (10.33)	--	6 (10.71)	14 (7.41)	--	2 (7.14)	2 (0.34)	--	--	27 (4.89)	3 (2.7)	27 (4.88)
Telemedicine	1 (16.67)	9 (16.36)	2 (11.76)	8 (32)	13 (56.52)	5 (25)	1 (4.35)	14 (45.16)	324 (35.45)	86 (35.54)	18 (60)	23 (41.07)	67 (35.45)	3 (30)	11 (39.29)	263 (44.5)	6 (66.67)	5 (26.32)	134 (24.28)	40 (36.04)	134 (24.23)
Unknown	--	2 (3.64)	1 (5.88)	--	--	6 (30)	4 (17.39)	--	18 (1.97)	3 (1.24)	2 (6.67)	1 (1.79)	3 (1.59)	1 (10)	4 (14.29)	6 (1.02)	--	3 (15.79)	29 (5.25)	3 (2.7)	29 (5.24)
	Archictecture and Engineering	Building and Grounds Cleaning and Maintenance	Business and Financial	Community and Social Service	Construction and Extraction	Education, Training, and Library	Farming, Fishing, and Forestry	Food Preparation and Serving Related	Healthcare Practitioners and Technical	Healthcare Support	Installation, Maintenance, and Repair	Management	Office and Administrative Support	Personal Care and Service	Production	Protective Service	Sales and Related	Transportation and Material Moving	Unknown	Unknown RUCA	Unknown Worker Group Assignment
Outcomes
Any Symptoms
Yes	5 (83.33)	41 (74.55)	13 (76.47)	19 (76)	20 (86.96)	7 (35)	7 (30.43)	21 (67.74)	630 (68.93)	153 (63.22)	25 (83.33)	35 (62.5)	121 (64.02)	7 (70)	19 (67.86)	445 (75.3)	8 (88.89)	16 (84.21)	332 (60.14)	87 (78.38)	333 (60.22)
None reported	1 (16.67)	14 (25.45)	4 (23.53)	6 (24)	3 (13.04)	13 (65)	16 (69.57)	10 (32.26)	284 (31.07)	89 (36.78)	5 (16.67)	21 (37.5)	68 (35.98)	3 (30)	9 (32.14)	146 (24.7)	1 (11.11)	3 (15.79)	220 (39.86)	24 (21.62)	220 (39.78)
Hospitalized
Yes	--	2 (3.64)	1 (5.88)	2 (8)	--	--	1 (4.35)	4 (12.9)	28 (3.06)	5 (2.07)	--	--	6 (3.17)	1 (10)	2 (7.14)	38 (6.43)	3 (33.33)	4 (21.05)	13 (2.36)	11 (9.91)	13 (2.35)
No	6 (100)	53 (96.36)	16 (94.12)	23 (92)	23 (100)	20 (100)	22 (95.65)	27 (87.1)	886 (96.94)	237 (97.93)	30 (100)	56 (100)	183 (96.83)	9 (90)	26 (92.86)	553 (93.57)	6 (66.67)	15 (78.95)	539 (97.64)	100 (90.09)	540 (97.65)
Died (link by SSN alone)
Yes	--	--	--	1	--	--	--	--	2	--	--	--	--	--	--	1	--	--	--
No									--
Lost Work
Yes	5 (83.33)	25 (45.45)	8 (47.06)	13 (52)	20 (86.96)	16 (80)	18 (78.26)	21 (67.74)	418 (45.73)	110 (45.45)	24 (80)	27 (48.21)	80 (42.33)	7 (70)	21 (75)	480 (81.22)	8 (88.89)	17 (89.47)	201 (36.41)	81 (72.97)	202 (36.53)
No	--	8 (14.55)	5 (29.41)	1 (4)	1 (4.35)	1 (5)	1 (4.35)	4 (12.9)	156 (17.07)	59 (24.38)	--	12 (21.43)	41 (21.69)	--	2 (7.14)	34 (5.75)	--	--	12 (2.17)	9 (8.11)	12 (2.17)
Unknown	1 (16.67)	22 (40)	4 (23.53)	11 (44)	2 (8.7)	3 (15)	4 (17.39)	6 (19.35)	340 (37.2)	73 (30.17)	6 (20)	17 (30.36)	68 (35.98)	3 (30)	5 (17.86)	77 (13.03)	1 (11.11)	2 (10.53)	339 (61.41)	21 (18.92)	339 (61.3)
Lost Work Reason
Due to Illness/Symptoms	5 (83.33)	22 (40)	7 (41.18)	12 (48)	20 (86.96)	14 (70)	16 (69.57)	18 (58.06)	370 (40.48)	92 (38.02)	23 (76.67)	21 (37.5)	75 (39.68)	7 (70)	19 (67.86)	422 (71.4)	8 (88.89)	15 (78.95)	195 (35.33)	75 (67.57)	196 (35.44)
Quarantine or Asymptomatic*	--	3 (5.45)	1 (5.88)	1 (4)	--	2 (10)	2 (8.7)	3 (9.68)	48 (5.25)	18 (7.44)	1 (3.33)	6 (10.71)	5 (2.65)	--	2 (7.14)	58 (9.81)	--	2 (10.53)	6 (1.09)	9 (8.11)	12 (2.17)
No Lost Time	--	8 (14.55)	5 (29.41)	1 (4)	1 (4.35)	1 (5)	1 (4.35)	4 (12.9)	156 (17.07)	59 (24.38)	--	12 (21.43)	41 (21.69)	--	2 (7.14)	34 (5.75)	--	--	12 (2.17)	6 (5.41)	6 (1.08)
Unknown	1 (16.67)	22 (40)	4 (23.53)	11 (44)	2 (8.7)	3 (15)	4 (17.39)	6 (19.35)	340 (37.2)	73 (30.17)	6 (20)	17 (30.36)	68 (35.98)	3 (30)	5 (17.86)	77 (13.03)	1 (11.11)	2 (10.53)	339 (61.41)	21 (18.92)	339 (61.3)
Lost Time Amount
<10 days	1 (16.67)	8 (14.55)	3 (17.65)	1 (4)	9 (39.13)	6 (30)	3 (13.04)	4 (12.9)	108 (11.82)	28 (11.57)	4 (13.33)	10 (17.86)	18 (9.52)	--	5 (17.86)	195 (32.99)	1 (11.11)	5 (26.32)	58 (10.51)	25 (22.52)	58 (10.49)
≥10 days	2 (33.33)	7 (12.73)	3 (17.65)	5 (20)	5 (21.74)	3 (15)	--	13 (41.94)	167 (18.27)	44 (18.18)	13 (43.33)	8 (14.29)	42 (22.22)	4 (40)	7 (25)	186 (31.47)	3 (33.33)	9 (47.37)	71 (12.86)	38 (34.23)	71 (12.84)
Lost Work but Unknown Amount	2 (33.33)	10 (18.18)	2 (11.76)	7 (28)	6 (26.09)	7 (35)	15 (65.22)	4 (12.9)	143 (15.65)	38 (15.7)	7 (23.33)	9 (16.07)	20 (10.58)	3 (30)	9 (32.14)	99 (16.75)	4 (44.44)	3 (15.79)	72 (13.04)	18 (16.22)	73 (13.2)
Unknown	1 (16.67)	22 (40)	4 (23.53)	11 (44)	2 (8.7)	3 (15)	4 (17.39)	6 (19.35)	340 (37.2)	73 (30.17)	6 (20)	17 (30.36)	68 (35.98)	3 (30)	5 (17.86)	77 (13.03)	1 (11.11)	2 (10.53)	339 (61.41)	21 (18.92)	339 (61.3)
Industry Group
Accomodation and Food Services	--	1 (1.82)	--	--	--	--	--	6 (19.35)	--	--	--	1 (1.79)	1 (0.53)	--	--	3 (0.51)	--	--	5 (0.91)	--	5 (0.9)
Administrative and Support and Waste Management Services	1 (16.67)	7 (12.73)	--	--	1 (4.35)	--	--	--	2 (0.22)	--	1 (3.33)	--	--	--	1 (3.57)	4 (0.68)	--	1 (5.26)	15 (2.72)	--	15 (2.71)
Agriculture, Forestry, Fishing, and Hunting	--	--	--	--	2 (8.7)	--	23 (100)	--	--	--	1 (3.33)	1 (1.79)	1 (0.53)	--	--	30 (5.08)	--	--	25 (4.53)	3 (2.7)	25 (4.52)
Arts, Entertainment, and Recreation	--	--	--	--	--	--	--	--	--	--	--	--	1 (0.53)	--	--	2 (0.34)	1 (11.11)	--	--	--	--
Construction	--	--	--	--	1 (4.35)	--	--	--	--	--	--	--	1 (0.53)	--	--	--	--	1 (5.26)	5 (0.91)	2 (1.8)	5 (0.9)
Educational Services	--	3 (5.45)	1 (5.88)	1 (4)	--	13 (65)	--	5 (16.13)	--	--	--	3 (5.36)	6 (3.17)	1 (10)	--	1 (0.17)	--	4 (21.05)	4 (0.72)	3 (2.7)	4 (0.72)
Finance and Insurance	--	--	--	--	--	--	--	--	--	--	--	--	1 (0.53)	--	--	--	1 (11.11)	--	--	--	--
Healthcare and Social Assistance	1 (16.67)	35 (63.64)	11 (64.71)	16 (64)	1 (4.35)	4 (20)	--	12 (38.71)	868 (94.97)	237 (97.93)	4 (13.33)	39 (69.64)	143 (75.66)	8 (80)	5 (17.86)	11 (1.86)	--	--	294 (53.26)	44 (39.64)	294 (53.16)
Information	--	--	--	--	--	--	--	--	--	--	--	--	--	--	--	--	--	--	1 (0.18)	--	1 (0.18)
Management of Companies and Enterprises	--	--	--	--	--	--	--	--	--	--	--	--	--	--	--	--	--	--	3 (0.54)	--	3 (0.54)
Manufacturing	1 (16.67)	--	--	--	--	--	--	--	--	--	--	--	--	--	4 (14.29)	--	--	--	11 (1.99)	--	11 (1.99)
Other Services, Except Public Administration	--	1 (1.82)	--	--	--	--	--	--	--	--	1 (3.33)	1 (1.79)	--	--	--	--	1 (11.11)	--	3 (0.54)	--	3 (0.54)
Professional, Scientific, and Technical Services	--	--	--	--	--	--	--	--	--	--	--	--	--	--	--	--	--	--	3 (0.54)	--	3 (0.54)
Public Administration	2 (33.33)	4 (7.27)	2 (11.76)	6 (24)	13 (56.52)	3 (15)	--	7 (22.58)	40 (4.38)	5 (2.07)	7 (23.33)	7 (12.5)	21 (11.11)	--	7 (25)	534 (90.36)	--	2 (10.53)	114 (20.65)	46 (41.44)	115 (20.8)
Real Estate and Rental and Leasing	--	--	--	--	--	--	--	--	--	--	--	2 (3.57)	1 (0.53)	--	--	--	--	--	13 (2.36)	--	13 (2.35)
Retail Trade	--	--	--	--	--	--	--	--	--	--	1 (3.33)	--	7 (3.7)	--	1 (3.57)	--	5 (55.56)	--	6 (1.09)	1 (0.9)	6 (1.08)
Transportation and Warehousing	--	4 (7.27)	--	--	--	--	--	--	--	--	--	--	4 (2.12)	1 (10)	1 (3.57)	--	1 (11.11)	7 (36.84)	7 (1.27)	--	7 (1.27)
Utilities	1 (16.67)	--	3 (17.65)	--	5 (21.74)	--	--	--	2 (0.22)	--	14 (46.67)	2 (3.57)	2 (1.06)	--	9 (32.14)	--	--	1 (5.26)	10 (1.81)	1 (0.9)	10 (1.81)
Wholesale Trade	--	--	--	--	--	--	--	--	--	--	--	--	--	--	--	--	--	2 (10.53)	2 (0.36)	--	2 (0.36)
Unknown	--	--	--	2 (8)	--	--	--	1 (3.23)	2 (0.22)	--	1 (3.33)	--	--	--	--	6 (1.02)	--	1 (5.26)	31 (5.62)	11 (9.91)	31 (5.61)
*asymptomatic with positive COVID-19 test

## Sheet: Appendix Table A2 OK
Supplemental Table S2	All Workers	Rural Urban Commuting Area			Worker Group Assignment				Occupation Group
		Metropolitan	Nonmetropolitan	Unknown	Healthcare	Other	Public Facing	Unknown	Architecture and Engineering	Building and Grounds Cleaning and Maintence	Business and Fincial Operations	Community and Social Service	Construction and Extraction	Education, Training, and Library	Farming, Fishing, and Forestry	Food Preparation and Serving Related	Healthcare Practitioners and Technical	Healthcare Support	Installation, Maintence, and Repair	Magement	Office and Administrative Support	Persol Care and Service	Production	Protective Service	Sales and Related	Transportation and Material Moving	unknown
Exposure Site/Worksite	N (%)	N (%)	N (%)	N (%)	N (%)	N (%)	N (%)	N (%)	N (%)	N (%)	N (%)	N (%)	N (%)	N (%)	N (%)	N (%)	N (%)	N (%)	N (%)	N (%)	N (%)	N (%)	N (%)	N (%)	N (%)	N (%)	N (%)
Farm (all farms, orchard crop production facility excluding nursery, livestock and forest)	12 (0.42)	8 (0.31)	3 (1.59)	1 (0.9)	--	--	9 (2.22)	3 (0.54)	--	--	--	--	--	--	9 (39.13)	--	--	--	--	--	--	--	--	--	--	--	3 (0.54)
Forest	3 (0.11)	2 (0.08)	1 (0.53)	--	1 (0.14)	--	1 (0.25)	1 (0.18)	--	--	--	--	--	--	--	--	--	--	--	--	1 (0.53)	--	--	1 (0.17)	--	--	1 (0.18)
Livestock and animal specialty production (includes all livestock production, including dairy, poultry and egg farms, horse farms, game farms, fur production farms, worm farms, pet breeding farms, apiaries and aquaculture facilities)	5 (0.18)	4 (0.16)	1 (0.53)	--	--	--	2 (0.49)	3 (0.54)	--	--	--	--	--	--	--	--	--	--	--	--	1 (0.53)	--	1 (3.57)	--	--	--	3 (0.54)
Other non-production agricultural processing facility (this includes fruit and vegetable packing facilities, other post-harvest processing facilities such as cotton ginning. Refer to code 32 for farm product storage facilities)	3 (0.11)	3 (0.12)	--	--	1 (0.14)	--	2 (0.49)	--	--	--	--	--	--	--	2 (8.7)	--	--	--	--	--	--	--	--	1 (0.17)	--	--	--
Private Residence
Private residence, type not specified	1 (0.04)	1 (0.04)	--	--	1 (0.14)	--	--	--	--	--	--	--	--	--	--	--	--	--	--	--	--	1 (10)	--	--	--	--	--
Institution
School	43 (1.51)	30 (1.18)	10 (5.29)	3 (2.7)	29 (4.16)	3 (0.25)	7 (1.72)	4 (0.72)	--	2 (3.64)	1 (5.88)	1 (4)	--	16 (80)	--	5 (16.13)	2 (0.22)	1 (0.41)	--	3 (5.36)	3 (1.59)	1 (10)	--	1 (0.17)	--	3 (15.79)	4 (0.72)
Prison	515 (18.08)	408 (16.01)	67 (35.45)	40 (36.04)	373 (53.52)	34 (2.85)	32 (7.88)	76 (13.74)	--	3 (5.45)	--	6 (24)	10 (43.48)	3 (15)	--	7 (22.58)	29 (3.17)	5 (2.07)	6 (20)	2 (3.57)	5 (2.65)	--	3 (10.71)	357 (60.41)	--	1 (5.26)	76 (13.77)
Hospital	1586 (55.69)	1510 (59.26)	38 (20.11)	38 (34.23)	47 (6.74)	1078 (90.44)	185 (45.57)	276 (49.91)	1 (16.67)	32 (58.18)	12 (70.59)	15 (60)	1 (4.35)	1 (5)	--	11 (35.48)	827 (90.48)	215 (88.84)	4 (13.33)	39 (69.64)	128 (67.72)	2 (20)	5 (17.86)	14 (2.37)	--	--	276 (50)
Outpatient clinic	71 (2.49)	61 (2.39)	6 (3.17)	4 (3.6)	2 (0.29)	52 (4.36)	9 (2.22)	8 (1.45)	--	--	--	1 (4)	--	--	--	--	37 (4.05)	15 (6.2)	--	--	10 (5.29)	--	--	--	--	--	8 (1.45)
Residential institituion (e.g., nursing home)	29 (1.02)	26 (1.02)	--	3 (2.7)	7 (1)	8 (0.67)	5 (1.23)	9 (1.63)	--	3 (5.45)	--	--	--	--	--	1 (3.23)	4 (0.44)	4 (1.65)	--	--	1 (0.53)	3 (30)	--	4 (0.68)	--	--	9 (1.63)
Home health (including health assistance in private residence)	4 (0.14)	4 (0.16)	--	--	1 (0.14)	2 (0.17)	--	1 (0.18)	--	--	--	--	--	--	--	--	1 (0.11)	1 (0.41)	--	--	--	1 (10)	--	--	--	--	1 (0.18)
Other institution	1 (0.04)	1 (0.04)	--	--	--	--	1 (0.25)	--	--	1 (1.82)	--	--	--	--	--	--	--	--	--	--	--	--	--	--	--	--	--
Manufacturing
Industrial facility (factory, computer manufacturing)	1 (0.04)	1 (0.04)	--	--	--	--	1 (0.25)	--	--	--	--	--	--	--	--	--	--	--	--	--	--	--	1 (3.57)	--	--	--	--
Food manufacturing - includes processing of animals into food products for sale, including, slaughtering, canning, pickling, freezing, and dehydrating.	2 (0.07)	2 (0.08)	--	--	--	--	1 (0.25)	1 (0.18)	--	--	--	--	--	--	--	--	--	--	--	--	--	--	1 (3.57)	--	--	--	1 (0.18)
Food manufacturing – fruits, grains and vegetables into food products for sale, including, canning, pickling, freezing, dehydrating, milling, and baking.	3 (0.11)	3 (0.12)	--	--	--	--	3 (0.74)	--	--	--	--	--	--	--	3 (13.04)	--	--	--	--	--	--	--	--	--	--	--	--
Other manufacturing facility	7 (0.25)	7 (0.27)	--	--	1 (0.14)	--	1 (0.25)	5 (0.9)	--	--	--	--	--	--	--	--	--	--	--	1 (1.79)	--	--	1 (3.57)	--	--	--	5 (0.91)
Commercial Facilities, non-manufacturing
Office/business (non-retail, non-industrial)	46 (1.62)	43 (1.69)	2 (1.06)	1 (0.9)	5 (0.72)	--	25 (6.16)	16 (2.89)	--	1 (1.82)	1 (5.88)	--	--	--	--	--	--	--	1 (3.33)	3 (5.36)	18 (9.52)	--	1 (3.57)	3 (0.51)	2 (22.22)	--	16 (2.9)
Retail establishment (include yard and garden centers, florists, retail nurseries)	17 (0.6)	13 (0.51)	3 (1.59)	1 (0.9)	5 (0.72)	--	8 (1.97)	4 (0.72)	--	--	--	--	--	--	--	1 (3.23)	--	--	--	--	6 (3.17)	--	1 (3.57)	--	5 (55.56)	--	4 (0.72)
Service establishment (include restaurants, hotels (rented out hourly, daily or weekly), health clubs, other facilities that usually fall into service industry and are not included in other specific codes for this variable)	13 (0.46)	13 (0.51)	--	--	3 (0.43)	--	5 (1.23)	5 (0.9)	--	2 (3.64)	--	--	--	--	--	4 (12.9)	--	--	--	1 (1.79)	1 (0.53)	--	--	--	--	--	5 (0.91)
Warehouse distribution centers	14 (0.49)	14 (0.55)	--	--	--	--	14 (3.45)	--	--	3 (5.45)	--	--	--	--	--	--	--	--	--	--	3 (1.59)	--	--	--	--	8 (42.11)	--
Other
Road /rail	1 (0.04)	1 (0.04)	--	--	1 (0.14)	--	--	--	--	--	--	--	--	--	--	--	--	--	--	--	--	--	--	1 (0.17)	--	--	--
Private vehicle	1 (0.04)	1 (0.04)	--	--	--	--	1 (0.25)	--	--	--	--	--	--	--	--	--	--	--	--	--	--	--	1 (3.57)	--	--	--	--
Public transportation vehicle	1 (0.04)	1 (0.04)	--	--	1 (0.14)	--	--	--	--	--	--	--	--	--	--	--	--	--	--	--	--	--	--	--	--	1 (5.26)	--
Other	49 (1.72)	39 (1.53)	8 (4.23)	2 (1.8)	24 (3.44)	2 (0.17)	13 (3.2)	10 (1.81)	2 (33.33)	3 (5.45)	--	--	1 (4.35)	--	1 (4.35)	1 (3.23)	2 (0.22)	--	--	2 (3.57)	5 (2.65)	--	1 (3.57)	20 (3.38)	--	1 (5.26)	10 (1.81)
Emergency response vehicle	4 (0.14)	4 (0.16)	--	--	4 (0.57)	--	--	--	--	--	--	--	--	--	--	--	--	--	--	--	--	--	--	4 (0.68)	--	--	--
More than one site	5 (0.18)	4 (0.16)	1 (0.53)	--	2 (0.29)	3 (0.25)	--	--	--	--	--	--	--	--	--	--	2 (0.22)	1 (0.41)	--	--	--	--	--	2 (0.34)	--	--	--
Unknown	411 (14.43)	344 (13.5)	49 (25.93)	18 (16.22)	189 (27.12)	10 (0.84)	81 (19.95)	131 (23.69)	3 (50)	5 (9.09)	3 (17.65)	2 (8)	11 (47.83)	--	8 (34.78)	1 (3.23)	10 (1.09)	--	19 (63.33)	5 (8.93)	7 (3.7)	2 (20)	12 (42.86)	183 (30.96)	2 (22.22)	5 (26.32)	130 (23.55)

## Sheet: Appendix Table A3 OK
		Rural-Urban Commuting Area			Worker Group Assignment				Occupation Group
Supplemental Table S3	All DFRs	Metropolitan	Non metropolitan	Unknown	Public Facing	Healthcare	Other	Unknown	Archictecture and Engineering	Building and Grounds Cleaning and Maintenance	Business and Financial	Community and Social Service	Construction and Extraction	Education, Training, and Library	Farming, Fishing, and Forestry	Food Preparation and Serving Related	Healthcare Practitioners and Technical	Healthcare Support	Installation, Maintenance, and Repair	Management	Office and Administrative Support	Personal Care and Service	Production	Protective Service	Sales and Related	Transportation and Material Moving	Unknown
	N (%)	N (%)	N (%)	N (%)	N (%)	N (%)	N (%)	N (%)	N (%)	N (%)	N (%)	N (%)	N (%)	N (%)	N (%)	N (%)	N (%)	N (%)	N (%)	N (%)	N (%)	N (%)	N (%)	N (%)	N (%)	N (%)	N (%)
N	2848	2548	189	111	697	1192	406	553	6	55	17	25	23	20	23	31	914	242	30	56	189	10	28	591	9	19	552
Any Symptoms
Yes	1932 (67.84)	1727 (67.78)	118 (62.43)	87 (78.38)	516 (74.03)	802 (67.28)	281 (69.21)	333 (60.22)	5 (83.33)	41 (74.55)	13 (76.47)	19 (76)	20 (86.95)	7 (35)	7 (30.43)	21 (67.74)	630 (68.93)	153 (63.22)	25 (83.33)	35 (62.50)	121 (64.02)	7 (70)	19 (67.86)	445 (75.30)	8 (88.89)	16 (84.21)	332 (60.14)
None reported	916 (32.16)	821 (32.22)	71 (37.57)	24 (21.62)	181 (25.97)	390 (32.72)	125 (30.79)	220 (39.78)	1 (16.67)	14 (25.45)	4 (23.53)	6 (24)	3 (13.04)	13 (65)	16 (69.57)	10 (32.26)	284 (31.07)	89 (36.78)	5 (16.67)	21 (37.50)	68 (35.98)	3 (30)	9 (32.14)	146 (24.70)	1 (11.11)	3 (15.79)	220 (39.86)
By Organ/Body System
Respiratory
Yes	1485 (52.14)	1329 (52.16)	90 (47.62)	66 (59.46)	417 (59.83)	597 (50.08)	220 (54.19)	251 (45.39)	5 (83.33)	29 (52.73)	8 (47.06)	16 (64)	18 (78.26)	6 (30)	7 (30.43)	18 (58.06)	474 (51.86)	109 (45.04)	21 (70)	26 (46.43)	97 (51.32)	4 (40)	14 (50)	359 (60.74)	7 (77.78)	12 (63.16)	250 (45.29)
None Reported	1363 (47.86)	1219 (47.84)	99 (52.38)	45 (40.54)	280 (40.17)	595 (49.92)	186 (45.81)	302 (54.61)	1 (16.67)	26 (47.27)	9 (52.94)	9 (36)	5 (21.74)	14 (70)	16 (69.57)	13 (41.94)	440 (48.14)	133 (54.96)	9 (30)	30 (53.57)	92 (48.68)	6 (60)	14 (50)	232 (39.26)	2 (22.22)	7 (36.84)	302 (54.71)
Nervous
Yes	1136 (39.89)	1020 (40.03)	64 (33.86)	52 (46.85)	353 (50.65)	440 (36.91)	163 (40.15)	180 (32.55)	2 (33.33)	23 (41.82)	7 (41.18)	11 (44)	14 (60.87)	5 (25)	2 (8.70)	11 (35.48)	340 (37.20)	92 (38.02)	20 (66.67)	20 (35.71)	65 (34.39)	4 (40)	13 (46.43)	309 (52.28)	5 (55.56)	10 (52.63)	180 (32.61)
None Reported	1712 (60.11)	1528 (59.97)	125 (66.14)	59 (53.15)	344 (49.35)	752 (63.09)	243 (59.85)	373 (67.45)	4 (66.67)	32 (58.18)	10 (58.82)	14 (56)	9 (39.13)	15 (75)	21 (91.30)	20 (64.52)	574 (62.80)	150 (61.98)	10 (33.33)	36 (64.29)	124 (65.61)	6 (60)	15 (53.57)	282 (47.72)	4 (44.44)	9 (47.37)	372 (67.39)
Gastrointestinal
Yes	375 (13.17)	343 (13.46)	15 (7.94)	17 (15.32)	95 (13.63)	150 (12.58)	58 (14.29)	72 (13.02)	2 (33.33)	7 (12.73)	2 (11.76)	3 (12)	6 (26.09)	1 (5)	5 (21.74)	3 (9.68)	110 (12.04)	35 (14.46)	7 (23.33)	8 (14.29)	16 (8.47)	2 (20)	8 (28.57)	86 (14.55)	1 (11.11)	1 (5.26)	72 (13.04)
None Reported	2473 (86.83)	2205 (86.54)	174 (92.06)	94 (84.68)	602 (86.37)	1042 (87.42)	348 (85.71)	481 (86.98)	4 (66.67)	48 (87.27)	15 (88.24)	22 (88)	17 (73.91)	19 (95)	18 (78.26)	28 (90.32)	804 (87.96)	207 (85.54)	23 (76.67)	48 (85.71)	173 (91.53)	8 (80)	20 (71.43)	505 (85.45)	8 (88.89)	18 (94.74)	480 (86.96)
Eye/Ocular
Yes	17 (0.60)	16 (0.63)	1 (0.53)	0 (0)	4 (0.57)	5 (0.42)	2 (0.49)	6 (1.08)	0 (0)	1 (1.82)	0 (0)	0 (0)	0 (0)	0 (0)	0 (0)	0 (0)	2 (0.22)	3 (1.24)	0 (0)	0 (0)	1 (0.53)	0 (0)	0 (0)	3 (0.51)	1 (11.11)	0 (0)	6 (1.09)
None Reported	2831 (99.40)	2532 (99.37)	188 (99.47)	111 (100)	693 (99.43)	1187 (99.58)	404 (99.51)	547 (98.92)	6 (100)	54 (98.18)	17 (100)	25 (100)	23 (100)	20 (100)	23 (100)	31 (100)	912 (99.78)	239 (98.76)	30 (100)	56 (100)	188 (99.47)	10 (100)	28 (100)	588 (99.49)	8 (88.89)	19 (100)	546 (98.91)
Dermatologic
Yes	26 (0.91)	23 (0.90)	2 (1.06)	1 (0.90)	6 (0.86)	7 (0.59)	5 (1.23)	8 (1.45)	0 (0)	1 (1.82)	0 (0)	0 (0)	0 (0)	0 (0)	0 (0)	1 (3.23)	7 (0.77)	0 (0)	2 (6.67)	1 (1.79)	1 (0.53)	0 (0)	0 (0)	5 (0.85)	0 (0)	0 (0)	8 (1.45)
None Reported	2822 (99.09)	2525 (99.10)	187 (98.94)	110 (99.10)	691 (99.14)	1185 (99.41)	401 (98.77)	545 (98.55)	6 (100)	54 (98.18)	17 (100)	25 (100)	23 (100)	20 (100)	23 (100)	30 (96.77)	907 (99.23)	242 (100)	28 (93.33)	55 (98.21)	188 (99.47)	10 (100)	28 (100)	586 (99.15)	9 (100)	19 (100)	544 (98.55)
Mental Health
Yes	73 (2.56)	65 (2.55)	5 (2.65)	3 (2.7)	15 (2.15)	12 (1.01)	17 (4.19)	29 (5.24)	1 (16.67)	2 (3.64)	0 (0)	0 (0)	3 (13.04)	0 (0)	0 (0)	0 (0)	11 (1.20)	1 (0.41)	2 (6.67)	0 (0)	4 (2.12)	0 (0)	2 (7.14)	14 (2.37)	1 (11.11)	2 (10.53)	29 (5.25)
None Reported	2775 (97.44)	2483 (97.45)	184 (97.35)	108 (97.3)	682 (97.85)	1180 (98.99)	389 (95.81)	524 (94.76)	5 (83.33)	53 (96.36)	17 (100)	25 (100)	20 (86.96)	20 (100)	23 (100)	31 (100)	903 (98.80)	241 (99.59)	28 (93.33)	56 (100)	185 (97.88)	10 (100)	26 (92.86)	577 (97.63)	8 (88.89)	17 (89.47)	523 (94.75)
Renal Genitourinary
Yes	10 (0.35)	9 (0.35)	1 (0.53)	0 (0)	2 (0.29)	3 (0.25)	1 (0.25)	4 (0.72)	0 (0)	1 (1.82)	0 (0)	0 (0)	0 (0)	0 (0)	0 (0)	0 (0)	2 (0.22)	1 (0.41)	0 (0)	0 (0)	0 (0)	0 (0)	0 (0)	1 (0.17)	1 (11.11)	0 (0)	4 (0.72)
None Reported	2838 (99.65)	2539 (99.65)	188 (99.47)	111 (100)	695 (99.71)	1189 (99.75)	405 (99.75)	549 (99.28)	6 (100)	54 (98.18)	17 (100)	25 (100)	23 (100)	20 (100)	23 (100)	31 (100)	912 (99.78)	241 (99.59)	30 (100)	56 (100)	189 (100)	10 (100)	28 (100)	590 (99.83)	8 (88.89)	19 (100)	548 (99.28)
Miscellaneous
Yes	1072 (37.64)	949 (37.24)	66 (34.92)	57 (51.35)	345 (49.50)	430 (36.07)	156 (38.42)	141 (25.5)	4 (66.67)	17 (30.91)	5 (29.41)	13 (52)	13 (56.52)	6 (30)	3 (13.04)	13 (41.94)	338 (36.98)	85 (35.12)	17 (56.67)	14 (25)	68 (35.98)	5 (50)	12 (42.86)	296 (50.08)	7 (77.78)	11 (57.89)	141 (25.54)
None Reported	1776 (62.36)	1599 (62.76)	123 (65.08)	54 (48.65)	352 (50.50)	762 (63.93)	250 (61.58)	412 (74.5)	2 (33.33)	38 (69.09)	12 (70.59)	12 (48)	10 (43.48)	14 (70)	20 (86.96)	18 (58.06)	576 (63.02)	157 (64.88)	13 (43.33)	42 (75)	121 (64.02)	5 (50)	16 (57.14)	295 (49.92)	2 (22.22)	8 (42.11)	411 (74.46)
Cardiovascular
Yes	298 (10.46)	239 (9.38)	29 (15.34)	30 (27.03)	83 (11.91)	105 (8.81)	53 (13.05)	57 (10.31)	1 (16.67)	7 (12.73)	3 (17.65)	0 (0)	1 (4.35)	2 (10)	3 (13.04)	6 (19.35)	78 (8.53)	26 (10.74)	3 (10)	4 (7.14)	19 (10.05)	1 (10)	4 (14.29)	73 (12.35)	3 (33.33)	5 (26.32)	56 (10.14)
None Reported	2550 (89.54)	2309 (90.62)	160 (84.66)	81 (72.97)	614 (88.09)	1087 (91.19)	353 (86.95)	496 (89.69)	5 (83.33)	48 (87.27)	14 (82.35)	25 (100)	22 (95.65)	18 (90)	20 (86.96)	25 (80.65)	836 (91.47)	216 (89.26)	27 (90)	52 (92.86)	170 (89.95)	9 (90)	24 (85.71)	518 (87.65)	6 (66.67)	14 (73.68)	496 (89.86)

## Sheet: Supplemental Table S2
Supplemental Table S4
All Symptoms	All DFRS N (%)
Any Symptom = Yes	1932 (67.84)		All Symptoms	All DFRS N (%)
Nervous	1136 (39.89)		Gastrointestinal	375 (13.17)
Ataxia	17 (0.60%)		Abdominal pain	55 (1.93%)
Hyperactivity	ⱡ		Anorexia	38 (1.33%)
Coma	ⱡ		Vomiting	57 (2.00%)
Confusion	33 (1.16%)		Nausea	141 (4.95%)
Headache	610 (21.41%)		Diarrhea	224 (7.86%)
Paralysis	0 (0%)
Loss of Speech	0 (0%)		Eye/Ocular	17 (0.60)
Diaphoresis	10 (0.35%)		Miosis	0 (0%)
Blurred vision	10 (0.35%)		Pain/irritation/inflation	15 (0.53%)
Dizziness	96 (3.37%)		Conjuctivitis	0 (0%)
Myalgias/Muscle Pain/Body Aches	644 (22.60%)
Fainting	5 (0.18%)		Dermatological	26 (0.91)
Paresthesias	28 (0.98%)		Discoloration of fingers	ⱡ
Loss of taste	338 (11.86%)		Edema	7 (0.25%)
Memory loss	14 (0.49%)		Erythema	ⱡ
Anosmia	328 (11.51%)		Rash/irritation	16 (0.56%)
			Pain	ⱡ
Respiratory	1485 (52.14%)		Pruritis	ⱡ
Cough	907 (31.84%)		Pattern	0 (0%)
Dry	142 (4.98%)		Hives	ⱡ
Productive	32 (1.12%)
Both	5 (0.18%)		Mental Health	73 (2.56)
Only listed as cough	713 (25.03%)		Anxiety	37 (1.30%)
Cyanosis	ⱡ		Depression	15 (0.53%)
Upper respiratory pain/irritation	88 (3.09%)		Sleep disorder	39 (1.37%)
Dyspnea	505 (17.73%)		Stress	22 (0.77%)
Hyperventilation	7 (0.25%)		Suicidal ideation	ⱡ
Nasal congestion	292 (10.25%)
Wheezing	34 (1.19%)		Constitutional/Other	1072 (37.64)
Asthma attack	ⱡ		Hyperthermia/fever	638 (22.39%)
Sore throat	413 (14.50%)		Fatigue/malaise	524 (18.39%)
Runny Nose	143 (5.02%)		Night sweats	30 (1.05%)
Upper respiratory, NOS*	206 (7.23%)		Chills/rigors	295 (10.35%)
Pneumonia	46 (1.61%)		COVID symptoms, NOS*	39 (1.37%)
			Chest pressure/tightness/discomfort	83 (2.91%)
Renal GU	10 (0.35)
Polyuria	ⱡ
Cardiovascular	298 (10.46)
Bradycardia	11 (0.39%)
Cardiac arrest	0 (0%)
Conduction disturbance	ⱡ
Tachycardia	52 (1.83%)
Low blood pressure (BP)	15 (0.53%)
High BP	111 (3.90%)
Chest pain	119 (4.18%)
Palpitations	39 (1.37%)
ⱡ :suppressed cells less than five
*NOS = not otherwise specified
All organ systems symptoms included an "other" symptom free-text field, which are reflected in the top level organ system frequenciess but not shown here
